# Supplementary material for: A biobased Schiff base from protocatechualdehyde and its application in flame-retardant, low-smoke epoxy resin systems
Source: PubMed Central journal article supplement (PMC9072551; doi:10.1039/c9ra06574a), 2019-09-30
Supplement: RA-009-C9RA06574A-s001.pdf [file RA-009-C9RA06574A-s001.pdf]

## Supporting information

### **A biobased Schiff base from protocatechualdehyde and its application in flame-retardant, low-smoke epoxy resin systems**

Wei qi Xie<sup>a</sup>, Shi wen Huang<sup>a</sup>, Shumei Liu<sup>ab</sup>, and Jianqing Zhao<sup>\*ab</sup>

<sup>a</sup>School of Materials Science and Engineering, South China University of Technology, Guangzhou, 510640, P. R. China

<sup>b</sup>Key Laboratory of Polymer Processing Engineering, Ministry of Education, Guangzhou 510640, P. R. China

#### **Corresponding authors**

\*Tel./Fax: +86-13609724000. E-mail: psjqzhao@scut.edu.cn (Jianqing Zhao)

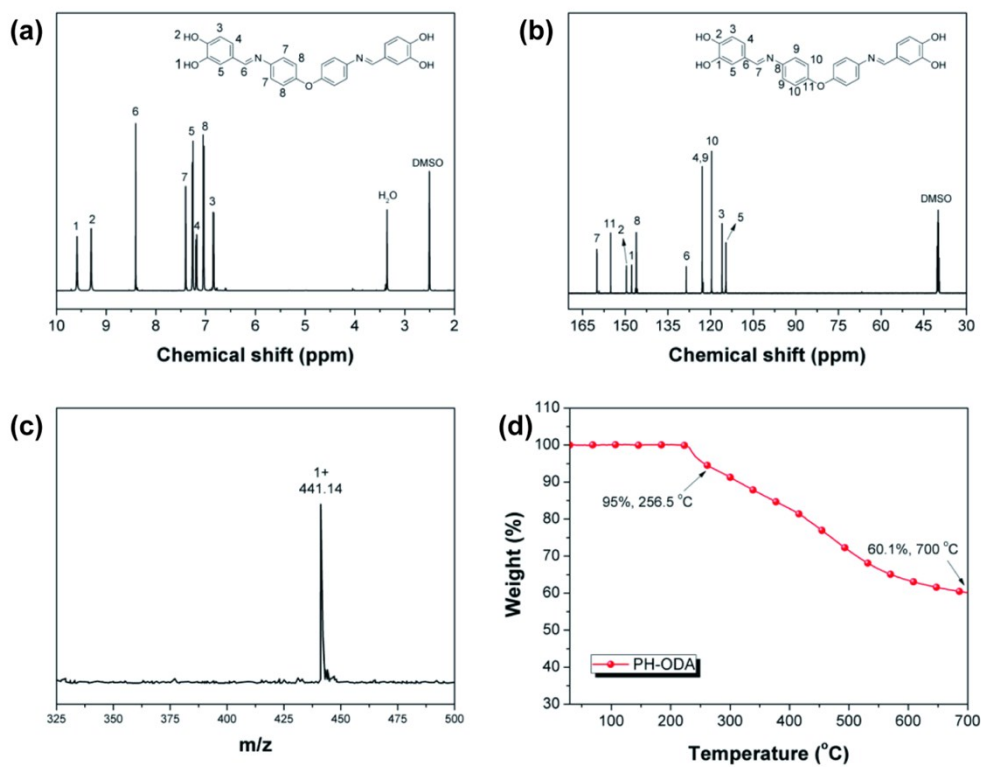

**Fig. S1** (a)  $^1\text{H-NMR}$ , (b)  $^{13}\text{C-NMR}$ , (c) HRESI-MS spectrum, and (d) TGA curve of PH-ODA

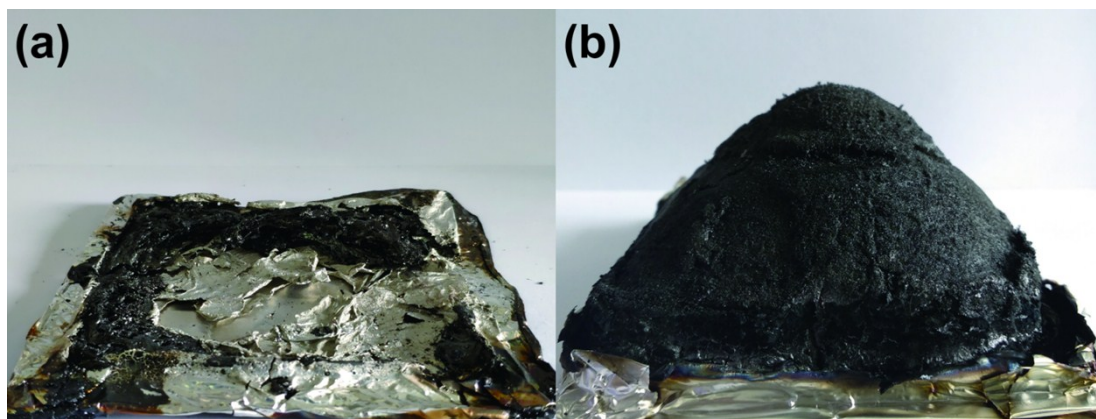

**Fig. S2** Photos of char residual of **(a)** PH-ODA-0 and **(b)** PH-ODA-10 after CCT

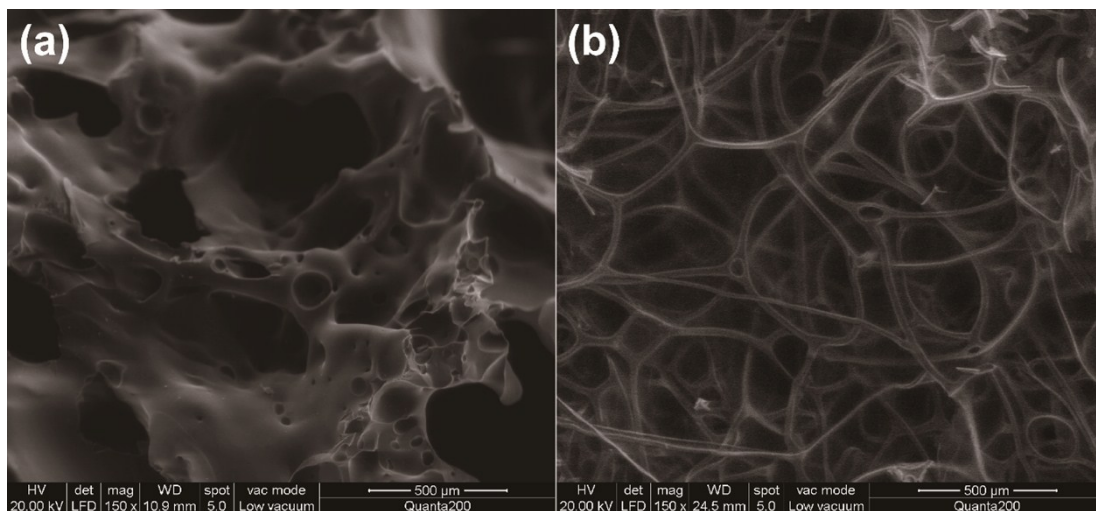

**Fig. S3** SEM images of char residual of **(a)** PH-ODA-0 and **(b)** PH-ODA-10 after CCT

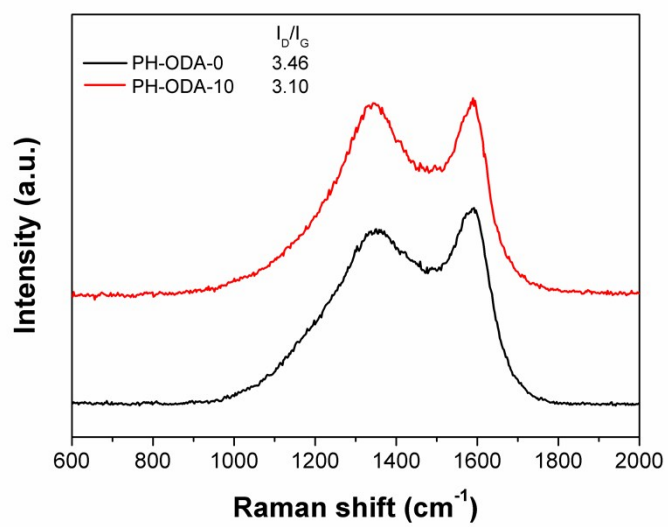

**Fig. S4** Raman spectra of char residues for PH-ODA-0 and PH-ODA-10 after CCT

**Table S1** List of the reported Schiff base structures for flame retardant epoxy resins

| Schiff base compound | Chemical structure | References |
|----------------------|--------------------|------------|
| PH-ODA               |                    | This work  |
| DP-DDE               |                    | [S1]       |
| DP-DDS               |                    | [S1]       |
| D-bp                 |                    | [S2]       |
| P-MSB                |                    | [S3]       |
| HD-DPPA              |                    | [S4]       |
| H-DPPA               |                    | [S5]       |
| DPN                  |                    | [S6]       |

## References

- S1. Gu, L., Chen, G., & Yao, Y. (2014). *Polymer degradation and stability*, 108, 68-75.
- S2. Xu, W., Wirasaputra, A., Liu, S., Yuan, Y., & Zhao, J. (2015). *Polymer degradation and stability*, 122, 44-51.
- S3. Xiong, Y., Jiang, Z., Xie, Y., Zhang, X., & Xu, W. (2013). *Journal of Applied Polymer Science*, 127(6), 4352-4358.
- S4. Luo, Q., Yuan, Y., Dong, C., Liu, S., & Zhao, J. (2016). *Materials Letters*, 169, 103-106.
- S5. Luo, Q., Yuan, Y., Dong, C., Huang, H., Liu, S., & Zhao, J. (2016). *Industrial & Engineering Chemistry Research*, 55(41), 10880-10888.
- S6. Chen, T., Chen, X., Wang, M., Hou, P., Jie, C., Li, J., ... & Dai, L. (2018). *Polymers for Advanced Technologies*, 29(1), 603-611.
